# Supplementary material
Source: publisher site journal article supplement (http://content.karger.com/ProdukteDB/miscArchiv/000/103/161/Suppl_Mateiral.pdf)
Supplement: Supplementary file 1 [file Suppl_Mateiral.pdf]

# Supplementary material

A high-resolution linkage map for the Z chromosome in chicken reveals hot spots for recombination

Per Wahlberg, Lina Strömstedt, Xavier Tordoir, Mario Foglio, Simon Heath, Doris Lechner, Anders R. Hellström, Michele Tixier-Boichard, Mark Lathrop, Ivo G. Gut and Leif Andersson

**Supplementary Table 1.** Primer sequences and corresponding sequence contigs (February 2004 assembly) assigned to chicken chromosome W in this study.

| Primer       | Contig | Sequence 5'-3'           |
|--------------|--------|--------------------------|
| rs14691881_F | 1029.4 | ACAGTCATCATCCAATCGCAGTG  |
| rs14691881_R |        | GTGGGGATGGGAGAATGTGAGTA  |
| rs13804259_F | 1464.1 | TGTCTCATTTCAGTCAAACCTACG |
| rs13804259_R |        | AACAAATGAAAATCCAGAAAACA  |
| rs14703291_F | 1769.2 | TCATTTACACCAAGACAGACAC   |
| rs14703291_R |        | TGCAAAGAATTCAAACACAAATG  |
| rs14704770_F | 1904.1 | TTCCAGTTCACCCATTTCAAGC   |
| rs14704770_R |        | TACATTATTCCATCCGTTACAC   |
| rs14739111_F | 638.2  | AGAAAACAGAGAAAACAGAAAAC  |
| rs14739111_R |        | CAATACTAAAAGAAGGATACAGGA |
| rs14739961_F | 658.8  | CAATCAGGACAGGGTTTTAAGC   |
| rs14739961_R |        | CCTCCAAAAGTGAGGAAACATC   |
| rs13816857_F | 954.7  | AGGCAAAGATGAAAAGTACACCA  |
| rs13816857_R |        | GGCATTGGAATACATTTGAGA    |
| rs14748167_F | 986.3  | GAACATTTGCAGTGAAATCAACA  |
| rs14748167_R |        | CACTTTAAATTGGAGCATTTTGC  |
| rs16708822_F | 2157.3 | ATGGGAGAAAGTCTGGAGAAATC  |
| rs16708822_R |        | AGGCTTTTCTCCCTCTTAATTT   |

**Supplementary Table 2.** Markers included in the chicken chromosome Z linkage map. The map position in Kosambi centiMorgans (cM) and the positions on both the 2004 and 2006 assemblies are given. Markers within bins are sorted on the basis of the position in the 2006 assembly.

| Linkage map             | cM   | Genome assembly position |               | Marker                  | cM    | Z:position(bp) | Z:position(bp) |
|-------------------------|------|--------------------------|---------------|-------------------------|-------|----------------|----------------|
|                         |      | February 2004            | May 2006      |                         |       |                |                |
| rs14735985              | 0.0  | UN:136,383,361           | UN:33,014,441 | rs14757505 <sup>1</sup> | 51.7  | Z:7,789,062    | Z:14,225,605   |
| rs15993913              | 8.8  | UN:4,744,378             | Z:711,341     | rs16103666              | 51.7  | Z:7,843,713    | Z:14,281,917   |
| rs15993489              | 13.1 | UN:4,385,106             | Z:1,097,548   | rs14757661              | 51.7  | Z:8,035,916    | Z:14,483,557   |
| rs16098196              | 17.5 | Z:5,211                  | UN:41,283,873 | rs16104056              | 51.7  | Z:8,985,450    | Z:15,449,751   |
| rs16077650              | 19.6 | UN:140,458,402           | Z:1,155,544   | rs16104210              | 51.7  | Z:9,294,940    | Z:15,777,843   |
| rs16077650              | 19.6 | UN:132,416,459           | Z:1,388,262   | rs16098534              | 55.9  | Z:510,431      | Z:16,386,097   |
| rs15002180              | 19.6 | 14:1,405,031             | Z:1,596,721   | rs14752429              | 58.1  | Z:990,516      | Z:16,883,737   |
| rs15002117              | 21.8 | 14:1,165,386             | Z:1,856,884   | rs14752448              | 58.1  | Z:1,011,410    | Z:16,906,523   |
| rs14067572              | 23.9 | 14:1,044,618             | Z:1,991,048   | rs14752726              | 58.1  | Z:1,412,822    | Z:17,331,916   |
| rs15001909              | 23.9 | 14:850,364               | Z:2,194,289   | MCW055 <sup>1</sup>     | 62.3  | Z:1,880,642    | Z:17,805,556   |
| rs14067279              | 23.9 | 14:769,025               | Z:2,278,645   | rs13676692              | 62.3  | Z:1,973,470    | Z:17,922,819   |
| rs15001800              | 23.9 | 14:564,920               | Z:2,499,360   | rs16100280              | 64.5  | Z:3,016,097    | Z:19,058,084   |
| rs15001609              | 23.9 | 14:62,243                | Z:3,017,936   | rs14717486              | 64.5  | UN:89,013,853  | Z:19,147,167   |
| rs15713281              | 26.0 | 14:26,246                | Z:3,057,015   | rs16014150              | 64.5  | UN:37,961,215  | Z:19,222,745   |
| rs14715818              | 26.0 | UN:83,187,257            | Z:3,285,118   | rs16100452              | 64.5  | Z:3,261,489    | Z:19,345,559   |
| rs14711852              | 26.0 | UN:71,607,474            | Z:3,286,679   | rs16100556              | 64.5  | Z:3,453,168    | Z:19,552,965   |
| rs16455399              | 26.0 | 4_R:818,184              | Z:3,304,358   | rs16761631              | 64.5  | Z:3,594,701    | Z:19,704,008   |
| rs13820921              | 26.0 | 4_R:480,086              | Z:3,759,391   | rs16100926              | 64.5  | Z:3,979,630    | Z:20,112,510   |
| rs16090656              | 26.0 | UN:159,607,500           | Z:4,541,646   | rs13677045              | 71.7  | Z:4,851,986    | Z:21,020,522   |
| rs15249787              | 26.0 | 28:2,283,076             | Z:5,036,801   | rs13677057              | 71.7  | Z:4,943,889    | Z:21,118,929   |
| rs15249839              | 26.0 | 28:2,390,804             | Z:5,181,805   | ADL273                  | 89.0  | Z:11,070,329   | Z:26,113,164   |
| rs14306785              | 26.0 | 28:2,449,506             | Z:5,250,180   | rs16104617              | 91.1  | Z:9,613,748    | Z:24,001,916   |
| rs14306843              | 26.0 | 28:2,585,904             | Z:5,404,539   | rs16104549              | 91.1  | Z:9,541,934    | Z:24,077,620   |
| rs14689142              | 26.0 | UN:6,772,110             | Z:5,767,726   | rs14759861              | 91.1  | Z:11,005,733   | Z:26,175,862   |
| rs15996532              | 26.0 | UN:7,285,889             | Z:6,322,265   | rs13776838              | 93.2  | Z_R:112,852    | Z:26,589,751   |
| rs14689501              | 26.0 | UN:7,522,379             | Z:6,571,869   | rs14777222              | 93.2  | Z_R:283,188    | Z:26,766,373   |
| rs14742238              | 26.0 | UN:150,762,087           | Z:6,798,186   | UPS001                  | 93.2  | Z_R:606,175    | Z:27,109,597   |
| UPS003                  | 32.4 | Z_R:7,319,570            | Z:7,289,808   | rs14777437              | 93.2  | Z_R:622,952    | Z:27,127,494   |
| rs14783440              | 32.4 | Z_R:7,428,801            | Z:7,411,045   | rs14777443              | 93.2  | Z_R:628,210    | Z:27,132,752   |
| rs14783496              | 34.6 | Z_R:7,509,732            | Z:7,506,577   | rs14777636              | 93.2  | Z_R:852,292    | Z:27,366,282   |
| rs16779776              | 38.8 | Z_R:7,761,796            | Z:7,793,764   | rs16008576              | 93.2  | UN:25,433,777  | Z:28,322,312   |
| rs16128704              | 38.8 | Z_R:7,797,097            | Z:7,835,947   | rs16765674              | 93.2  | Z:12,137,305   | Z:28,560,394   |
| rs14783808              | 38.8 | Z_R:7,981,254            | Z:7,969,686   | rs16106682              | 93.2  | Z:12,343,936   | Z:28,782,824   |
| rs16129479              | 45.3 | Z_R:8,782,637            | Z:8,864,051   | rs16071074 <sup>1</sup> | 93.2  | UN:131,609,645 | Z:29,639,884   |
| rs14785652              | 45.3 | Z_R:10,012,011           | Z:10,345,543  | rs16123676              | 93.2  | Z_R:2,055,888  | Z:30,882,703   |
| rs16130939              | 45.3 | Z_R:10,290,280           | Z:10,646,509  | rs14778400              | 93.2  | Z_R:1,769,891  | Z:31,191,750   |
| rs14785975              | 45.3 | Z_R:10,431,957           | Z:10,796,625  | rs16123428              | 93.2  | Z_R:1,659,175  | Z:31,307,855   |
| rs16131190              | 49.5 | Z_R:10,607,056           | Z:10,989,801  | rs16123209              | 93.2  | Z_R:1,423,240  | Z:31,558,700   |
| rs14756180              | 51.7 | Z:6,080,492              | Z:12,389,748  | rs16108055              | 93.2  | Z:14,502,195   | Z:32,471,325   |
| UPS012                  | 51.7 | Z_R:14,989,141           | Z:12,440,583  | rs16026179              | 93.2  | UN:60,609,495  | UN:63,183,045  |
| rs16102700              | 51.7 | Z:6,324,688              | Z:12,663,377  | rs16766257              | 95.4  | Z:13,862,873   | Z:33,167,575   |
| rs16102951              | 51.7 | Z:6,544,236              | Z:12,906,328  | rs16107148              | 95.4  | Z:13,541,159   | Z:33,521,002   |
| rs14756702              | 51.7 | Z:6,627,406              | Z:12,984,515  | rs16765957              | 95.4  | Z:13,221,884   | Z:33,857,237   |
| rs14756854 <sup>1</sup> | 51.7 | Z:6,783,426              | Z:13,128,291  | rs14722876              | 101.8 | UN:105,446,960 | Z:34,555,738   |
| rs16103217 <sup>1</sup> | 51.7 | Z:6,850,053              | Z:13,199,637  | rs14764247              | 101.8 | Z:16,411,141   | Z:35,306,603   |
| rs16103283              | 51.7 | Z:7,055,128              | Z:13,433,889  | rs14764322              | 101.8 | Z:16,496,818   | Z:35,396,918   |
|                         |      |                          |               | rs14767841              | 101.8 | Z:16,531,722   | Z:35,439,558   |
|                         |      |                          |               | rs16110306              | 101.8 | Z:16,924,444   | Z:35,869,855   |
|                         |      |                          |               | rs14765130              | 101.8 | Z:17,650,428   | Z:36,723,498   |

|                         |                      |               |                         |                      |               |
|-------------------------|----------------------|---------------|-------------------------|----------------------|---------------|
| rs16768340              | 101.8 Z:17,852,022   | Z:36,935,719  | rs14751175              | 128.8 W:4,180,369    | Z:55,190,312  |
| rs14702899              | 101.8 UN:43,128,032  | Z:37,258,524  | rs16097183              | 128.8 W:4,226,761    | Z:55,240,702  |
| rs16111451              | 101.8 Z:18,329,817   | Z:37,463,467  | rs16096736 <sup>1</sup> | 131.0 W:3,754,941    | Z:55,849,379  |
| rs13783939              | 101.8 Z:18,628,876   | Z:37,792,194  | rs16096662              | 131.0 W:3,715,941    | Z:55,889,311  |
| rs16111717              | 101.8 Z:18,828,795   | Z:38,082,478  | rs16096607              | 131.0 W:3,674,529    | Z:55,931,579  |
| rs16131847              | 101.8 Z_R:11,638,473 | Z:38,315,236  | rs13798580              | 131.0 W:3,577,938    | Z:56,035,632  |
| rs14786890              | 101.8 Z_R:11,610,623 | Z:38,349,127  | rs14750382              | 131.0 W:3,410,245    | Z:56,224,179  |
| rs16131808              | 101.8 Z_R:11,588,258 | Z:38,373,746  | rs16096155              | 131.0 W:3,317,645    | Z:56,320,823  |
| rs14719980              | 101.8 UN:96,235,376  | Z:38,480,381  | rs16096023              | 131.0 W:3,237,608    | Z:56,403,505  |
| rs14787023              | 101.8 Z_R:11,890,142 | Z:38,669,972  | rs14750002              | 131.0 W:3,125,670    | Z:56,520,295  |
| rs16131926              | 101.8 Z_R:11,895,752 | Z:38,675,582  | rs13798426              | 131.0 W:2,835,725    | Z:56,828,040  |
| rs14787345              | 101.8 Z_R:12,524,946 | Z:39,348,264  | rs16095605              | 131.0 W:2,584,199    | Z:57,093,410  |
| rs16781908              | 113.9 Z_R:12,694,137 | Z:39,529,579  | rs16095547              | 131.0 W:2,459,197    | Z:57,220,134  |
| rs16132516              | 113.9 Z_R:13,229,420 | Z:40,102,027  | rs16095473              | 133.1 W:2,278,882    | Z:57,415,898  |
| rs16132849              | 113.9 Z_R:13,846,469 | Z:40,795,829  | rs16758198              | 133.1 W:1,462,452    | Z:58,438,322  |
| rs16132976              | 113.9 Z_R:14,137,322 | Z:41,089,729  | rs16094626              | 133.1 W:964,778      | Z:58,947,438  |
| rs16782623              | 113.9 Z_R:14,241,895 | Z:41,197,379  | rs16094539              | 135.2 W:883,837      | Z:59,035,940  |
| rs16133129              | 113.9 Z_R:14,845,898 | Z:41,657,931  | rs16094462              | 135.2 W:726,400      | Z:59,200,407  |
| rs16133103              | 113.9 Z_R:14,558,142 | Z:41,950,753  | rs16076245              | 135.2 UN:138,518,078 | Z:59,269,270  |
| rs15992814              | 113.9 UN:3,353,881   | Z:42,915,873  | rs15998193              | 135.2 UN:8,540,578   | Z:59,329,107  |
| rs16112313              | 113.9 Z:19,818,850   | Z:43,182,096  | rs15998133              | 135.2 UN:8,451,504   | Z:59,425,604  |
| rs16111920              | 113.9 Z:19,289,348   | Z:43,764,022  | rs13800962              | 135.2 UN:8,439,010   | Z:59,438,098  |
| rs16111918              | 113.9 Z:19,289,325   | Z:43,764,045  | rs16119873              | 135.2 Z:31,185,943   | Z:59,841,317  |
| rs16064698              | 113.9 UN:122,732,772 | Z:44,030,846  | rs16119736              | 135.2 Z:31,009,146   | Z:60,027,072  |
| rs16040257              | 113.9 UN:83,973,929  | Z:44,190,222  | rs16119734              | 135.2 Z:31,007,220   | Z:60,029,798  |
| rs14955912              | 113.9 10_R:1,390,501 | Z:44,827,470  | rs16119389              | 135.2 Z:30,394,833   | Z:60,715,472  |
| rs14767668              | 118.2 Z:23,142,023   | UN:14,353,232 | rs16119036              | 135.2 Z:29,893,446   | Z:61,281,958  |
| rs14694203              | 118.2 UN:19,370,246  | UN:32,189,462 | rs16118916              | 135.2 Z:29,629,527   | Z:61,572,315  |
| rs14015859              | 118.2 10_R:1,651,519 | Z:45,115,164  | rs16118632              | 135.2 Z:29,224,890   | Z:62,008,633  |
| rs14016786              | 118.2 10_R:3,496,080 | Z:47,128,465  | rs16118052              | 141.7 Z:28,541,271   | UN:40,663,233 |
| rs16083158              | 118.2 UN:148,057,024 | Z:47,544,766  | rs16118350              | 141.7 Z:28,966,502   | Z:62,300,901  |
| rs13801352              | 118.2 UN:10,270,397  | Z:47,696,843  | rs14772711              | 141.7 Z:28,844,066   | Z:62,428,311  |
| rs16113388              | 118.2 Z:22,938,801   | Z:48,406,834  | rs16118199              | 141.7 Z:28,741,161   | Z:62,534,791  |
| rs16769996              | 118.2 Z:22,863,629   | Z:48,495,705  | rs16068294              | 145.9 UN:127,778,958 | Z:63,861,610  |
| rs14767266              | 118.2 Z:22,411,100   | Z:48,981,626  | rs14775124              | 145.9 Z:31,765,781   | Z:64,245,726  |
| rs16112880              | 118.2 Z:22,122,667   | Z:49,322,809  | rs16120489              | 145.9 Z:31,798,703   | Z:64,281,239  |
| rs14708400              | 118.2 UN:60,052,077  | UN:58,331,322 | rs16774722 <sup>1</sup> | 145.9 Z:32,189,797   | Z:64,695,731  |
| rs16112358              | 120.3 Z:21,477,590   | Z:49,994,044  | rs14775885 <sup>1</sup> | 148.1 Z:32,546,086   | Z:65,075,880  |
| rs16113795              | 120.3 Z:23,633,387   | Z:50,465,135  | rs16121677              | 148.1 Z:32,793,305   | Z:65,351,510  |
| rs16114049 <sup>1</sup> | 120.3 Z:23,883,134   | Z:50,733,461  | rs16121915              | 150.2 Z:33,158,281   | Z:65,728,779  |
| rs16114279              | 122.4 Z:24,079,077   | Z:50,952,161  | rs14776556              | 150.2 Z:33,306,601   | Z:65,890,011  |
| rs16114316              | 122.4 Z:24,102,344   | Z:50,976,658  | rs16122099              | 150.2 Z:33,432,411   | Z:66,021,278  |
| rs16114494              | 122.4 Z:24,306,062   | Z:51,210,617  | rs16034959              | 152.3 UN:76,977,623  | Z:66,089,477  |
| rs16114675              | 122.4 Z:24,495,687   | Z:51,423,783  | rs13817458              | 152.3 Z:33,545,150   | Z:66,320,893  |
| rs16115031              | 122.4 Z:24,898,443   | Z:51,852,759  | rs16776886              | 154.5 Z_R:2,650,489  | Z:66,834,935  |
| rs16115428              | 126.7 Z:25,457,890   | Z:52,459,183  | UPS004                  | 154.5 Z_R:2,745,888  | Z:66,936,257  |
| rs16115888              | 126.7 Z:25,985,204   | Z:53,041,087  | rs16124385              | 154.5 Z_R:2,746,017  | Z:66,936,386  |
| rs16116207              | 126.7 Z:26,426,882   | Z:53,504,392  | rs14736553              | 154.5 UN:137,789,867 | Z:68,095,620  |
| rs16116653              | 126.7 Z:26,830,473   | Z:53,942,031  | rs16125413              | 158.7 Z_R:4,352,251  | Z:68,724,450  |
| rs14770890              | 126.7 Z:26,852,116   | Z:53,966,934  | rs14781095              | 158.7 Z_R:5,015,512  | Z:69,477,833  |
| rs16116788              | 126.7 Z:27,066,524   | Z:54,206,112  | rs14781227              | 158.7 Z_R:5,171,264  | Z:69,636,649  |
| rs16097757              | 128.8 W:4,785,778    | Z:54,714,017  | UPS005                  | 158.7 Z_R:5,721,557  | Z:70,219,051  |
| rs16097670              | 128.8 W:4,695,319    | Z:54,815,295  | rs16127597              | 158.7 Z_R:6,607,882  | Z:71,175,863  |
| rs16096956              | 128.8 W:4,008,757    | Z:55,003,897  | rs14782675 <sup>1</sup> | 158.7 Z_R:6,636,727  | Z:71,205,876  |
| rs14751139 <sup>1</sup> | 128.8 W:4,106,833    | Z:55,107,396  | rs16127903              | 158.7 Z_R:6,897,679  | Z:71,491,613  |

|            |                    |              |
|------------|--------------------|--------------|
| rs15991767 | 162.1 UN:1,999,135 | Z:73,147,457 |
| rs14684801 | 179.1 UN:1,058,010 | Z:73,657,364 |
| rs15990837 | 185.5 UN:1,148,163 | Z:73,750,193 |
| rs15990878 | 185.5 UN:1,163,078 | Z:73,765,057 |
| rs15991270 | 200.9 UN:1,460,928 | Z:74,084,935 |

---

<sup>1</sup>Markers that initially could not unambiguously be placed in a single bin in the map, and have been moved to the most likely position according to the chicken assembly of May 2006.

**Supplementary Table 3.** Markers assigned to the Z chromosome only based on the observation of 10 heterozygous males and no heterozygous females. The markers are sorted after their position (in base pair) in the May 2006 assembly and the location in the February 2004 assembly is also given.

| Marker     | Genome assembly position      |                          |            |                |              |
|------------|-------------------------------|--------------------------|------------|----------------|--------------|
|            | February 2004<br>Chr:position | May 2006<br>Chr:position |            |                |              |
| rs14688321 | UN:5,187,142                  | Z:231,490                | rs16781857 | Z_R:12,482,057 | Z:39,304,292 |
| rs14687646 | UN:4,523,913                  | Z:950,318                | rs14787542 | Z_R:12,827,686 | Z:39,669,592 |
| rs14067214 | 14:686,803                    | Z:2,372,042              | rs14955912 | 10_R:1,390,501 | Z:44,827,469 |
| rs14067088 | 14:485,288                    | Z:2,584,821              | rs14956052 | 10_R:1,621,877 | Z:45,072,689 |
| rs15001632 | 14:165,312                    | Z:2,908,384              | rs14015859 | 10_R:1,651,519 | Z:45,115,163 |
| rs15648873 | 4_R:992,867                   | Z:3,112,867              | rs14015865 | 10_R:1,659,274 | Z:45,123,488 |
| rs16007804 | UN:23,971,035                 | Z:3,253,130              | rs14956486 | 10_R:2,916,361 | Z:46,494,303 |
| rs16455399 | 4_R:818,184                   | Z:3,304,357              | rs14016786 | 10_R:3,496,080 | Z:47,128,464 |
| rs14507318 | 4_R:677,825                   | Z:3,530,872              | rs14716126 | UN:84,070,275  | Z:47,515,460 |
| rs13820921 | 4_R:480,086                   | Z:3,759,390              | rs14767471 | Z:22,655,952   | Z:48,722,748 |
| rs15648610 | 4_R:349,694                   | Z:3,902,899              | rs14766378 | Z:21,454,227   | Z:50,016,563 |
| rs14689221 | UN:6,909,413                  | Z:5,921,776              | rs14769506 | Z:25,163,615   | Z:52,149,216 |
| rs15996532 | UN:7,285,889                  | Z:6,322,264              | rs14769569 | Z:25,205,122   | Z:52,192,567 |
| rs14689521 | UN:7,576,521                  | Z:6,629,452              | rs16115994 | Z:26,096,534   | Z:53,164,169 |
| rs14783113 | Z_R:7,030,114                 | Z:6,955,086              | rs14738904 | UN:142,707,343 | Z:54,630,986 |
| rs16780115 | Z_R:8,404,037                 | Z:8,433,041              | rs16097497 | W:4,458,980    | Z:55,488,332 |
| rs16006093 | UN:21,617,030                 | Z:9,442,791              | rs16095859 | W:3,118,236    | Z:56,527,175 |
| rs14785567 | Z_R:9,908,079                 | Z:10,105,929             | rs13798440 | W:3,011,514    | Z:56,634,657 |
| rs14786714 | Z_R:11,265,313                | Z:11,683,674             | rs14749412 | W:1,954,301    | Z:57,764,664 |
| rs16102307 | Z:5,644,633                   | Z:11,934,800             | rs16095065 | W:1,722,147    | Z:58,156,750 |
| rs14710122 | UN:65,463,690                 | Z:14,120,331             | rs14749197 | W:1,642,026    | Z:58,246,907 |
| rs16098366 | Z:241,168                     | Z:16,109,238             | rs14748908 | W:1,314,034    | Z:58,596,932 |
| rs16099588 | Z:2,191,676                   | Z:18,161,143             | rs15998133 | UN:8,451,504   | Z:59,425,603 |
| rs16101107 | Z:4,278,927                   | Z:20,419,728             | rs13800962 | UN:8,439,010   | Z:59,438,097 |
| rs15001520 | 13_R:1,031,272                | Z:21,826,757             | rs14690039 | UN:8,297,197   | Z:59,590,332 |
| rs15001385 | 13_R:698,534                  | Z:22,182,498             | rs14774661 | Z:31,378,685   | Z:59,629,026 |
| rs14066341 | 13_R:641,272                  | Z:22,242,378             | rs14773641 | Z:29,913,860   | Z:61,260,759 |
| rs13788432 | 13_R:410,483                  | Z:22,487,127             | rs14773440 | Z:29,587,220   | Z:61,618,781 |
| rs13788418 | 13_R:253,603                  | Z:22,661,285             | rs14773275 | Z:29,388,215   | Z:61,832,447 |
| rs14759638 | Z:10,699,173                  | Z:22,834,423             | rs14773077 | Z:29,168,152   | Z:62,071,419 |
| rs16105339 | Z:10,309,927                  | Z:23,266,972             | rs14772105 | Z:28,339,371   | Z:62,867,847 |
| rs16105163 | Z:10,119,232                  | Z:23,465,961             | rs16117595 | Z:28,095,270   | Z:63,137,428 |
| rs16105146 | Z:10,099,613                  | Z:23,486,670             | rs14771350 | Z:27,594,287   | Z:63,676,573 |
| rs16106040 | Z:11,323,731                  | Z:25,840,646             | rs14774895 | Z:31,582,281   | Z:64,058,149 |
| rs14777366 | Z_R:520,247                   | Z:27,020,702             | rs16121860 | Z:32,997,820   | Z:65,566,461 |
| rs16080645 | UN:143,710,881                | Z:30,097,595             | rs14693451 | UN:17,073,542  | Z:66,269,794 |
| rs14706826 | UN:55,575,251                 | Z:31,044,162             | rs16126516 | Z_R:5,406,861  | Z:69,887,131 |
| rs14762832 | Z:15,081,597                  | Z:31,855,782             | rs13725663 | Z_R:5,659,678  | Z:70,155,554 |
| rs14763234 | Z:15,473,028                  | Z:34,279,091             | rs14782219 | Z_R:6,311,411  | Z:70,865,512 |
| rs14763396 | Z:15,626,672                  | Z:34,451,583             | rs14686246 | UN:2,739,544   | Z:71,979,376 |
| rs16109534 | Z:15,806,260                  | Z:34,663,498             | rs14686603 | UN:3,047,172   | Z:72,310,603 |
| rs14764176 | Z:16,330,176                  | Z:35,221,398             | rs15992691 | UN:3,068,072   | Z:72,331,306 |
| rs14764487 | Z:16,811,032                  | Z:35,739,163             | rs15992084 | UN:2,576,439   | Z:72,543,573 |
| rs14739816 | UN:144,494,303                | Z:35,945,289             | rs15991978 | UN:2,318,177   | Z:72,805,239 |
|            |                               |                          | rs14685710 | UN:2,109,080   | Z:73,028,601 |
|            |                               |                          | rs15990837 | UN:1,148,163   | Z:73,750,192 |
|            |                               |                          | rs14685087 | UN:1,347,798   | Z:73,969,607 |

rs14685395 UN:1,677,754 Z:74,317,242  
rs15168793 2:147,518,337 Z:74,508,147  
rs14506962 4\_R:35,872 UN:32,660,578  
rs14741634 UN:149,308,745 UN:39,463,393

rs13816158 UN:153,613,376 UN:60,318,363  
rs14708001 UN:58,886,668 UN:60,804,383  
rs14692484 UN:13,799,153 UN:9,861,559

**Supplementary Table 4.** Summary of markers assigned to chicken chromosome Z in relation to their location on the genome assembly (February 2004). The type of evidence for the assignment (linkage analysis and/or genotype distribution analysis) is indicated. Markers had to show • ten heterozygous males and no heterozygous females to be considered as Z-linked by genotype analysis.

| Previous assignment | Number of loci |         |          |
|---------------------|----------------|---------|----------|
|                     | Total          | Linkage | Genotype |
| Z                   | 117            | 87      | 30       |
| Z_Random            | 55             | 45      | 10       |
| W                   | 29             | 22      | 7        |
| Unknown             | 69             | 39      | 30       |
| 2                   | 1              | -       | 1        |
| 4_Random            | 8              | 2       | 6        |
| 10_Random           | 9              | 3       | 6        |
| 13_Random           | 5              | -       | 5        |
| 14                  | 11             | 8       | 3        |
| 28                  | 4              | 4       | -        |
| Total               | 308            | 210     | 98       |
